# Supplementary material for: Biochar-Compost Additions Have Strong Short-Term Effects on Carbon and Nitrogen Emissions from an Agricultural Soil
Source: MDPI journal article supplement (doi:10.3390/agronomy12122959), 2022-11-25
Supplement: s1 [file s1]

## Supplementary Material

**Table S1:** Maize yields in 2014. Treatments are control (K) and three BC-compost treatments (T1, T2 and T3). For application rates of BC-compost and mineral fertilizer see Table 1.

| Treatments | Maize yields [t ha <sup>-1</sup> ] |
|------------|------------------------------------|
| K          | 3.62 ± 0.44                        |
| T1         | 4.62 ± 0.72                        |
| T2         | 3.60 ± 1.54                        |
| T3         | 4.27 ± 0.72                        |

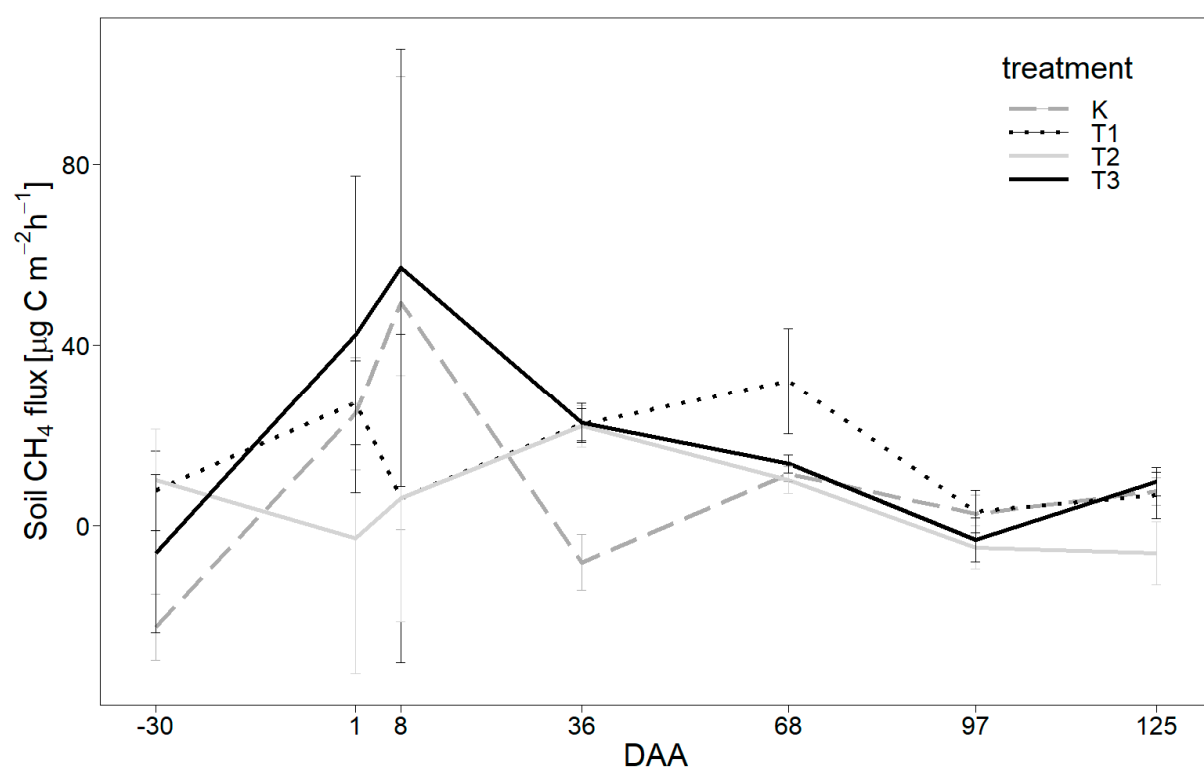

**Figure S1:** Mean soil CH<sub>4</sub> fluxes during the field experiment in 2014. Error bars represent standard error of mean; n = 3. K – control without BC-compost; T1 – 1 % BC-compost; T2 – 0.5 % BC-compost + 175 kg N ha<sup>-1</sup>; T3 – no fresh BC-compost during this field trial.

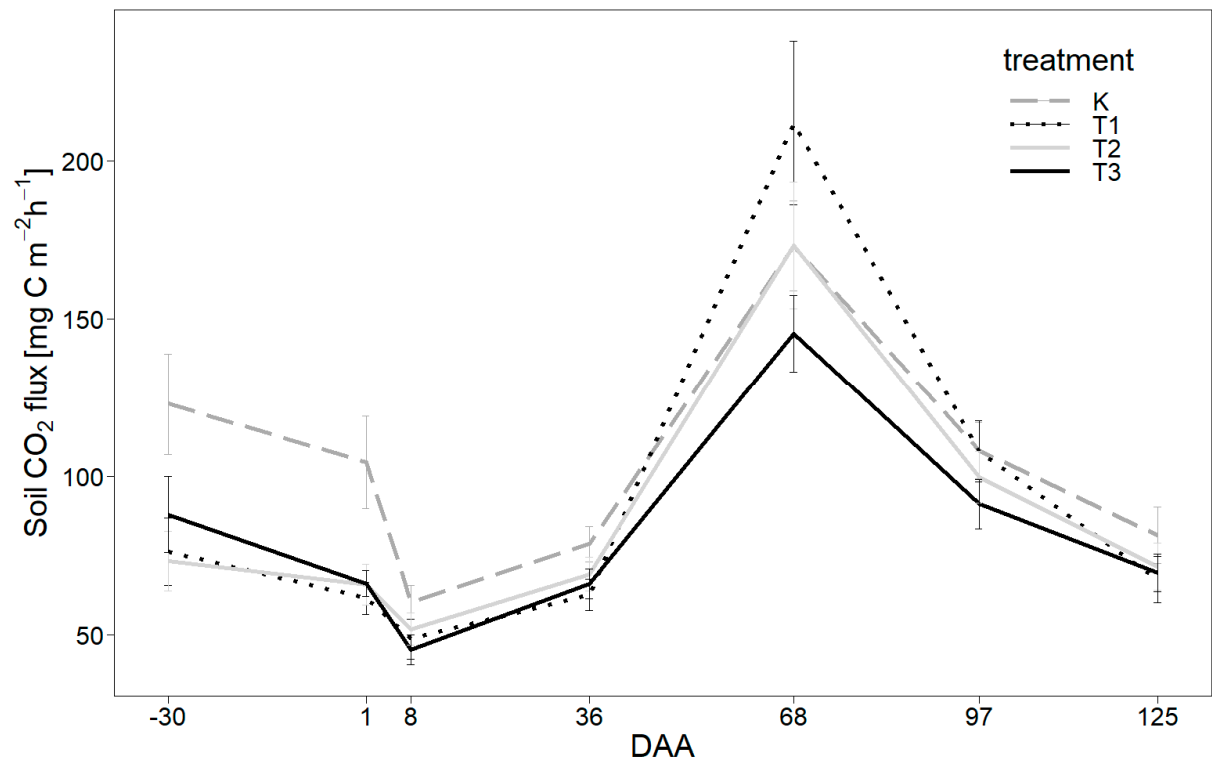

**Figure S2:** Mean soil CO<sub>2</sub> fluxes during the field experiment in 2014. Error bars represent standard error of mean; n = 3. K – control without BC-compost; T1 – 1 % BC-compost; T2 – 0.5 % BC-compost + 175 kg N ha<sup>-1</sup>; T3 – no fresh BC-compost during this field trial.

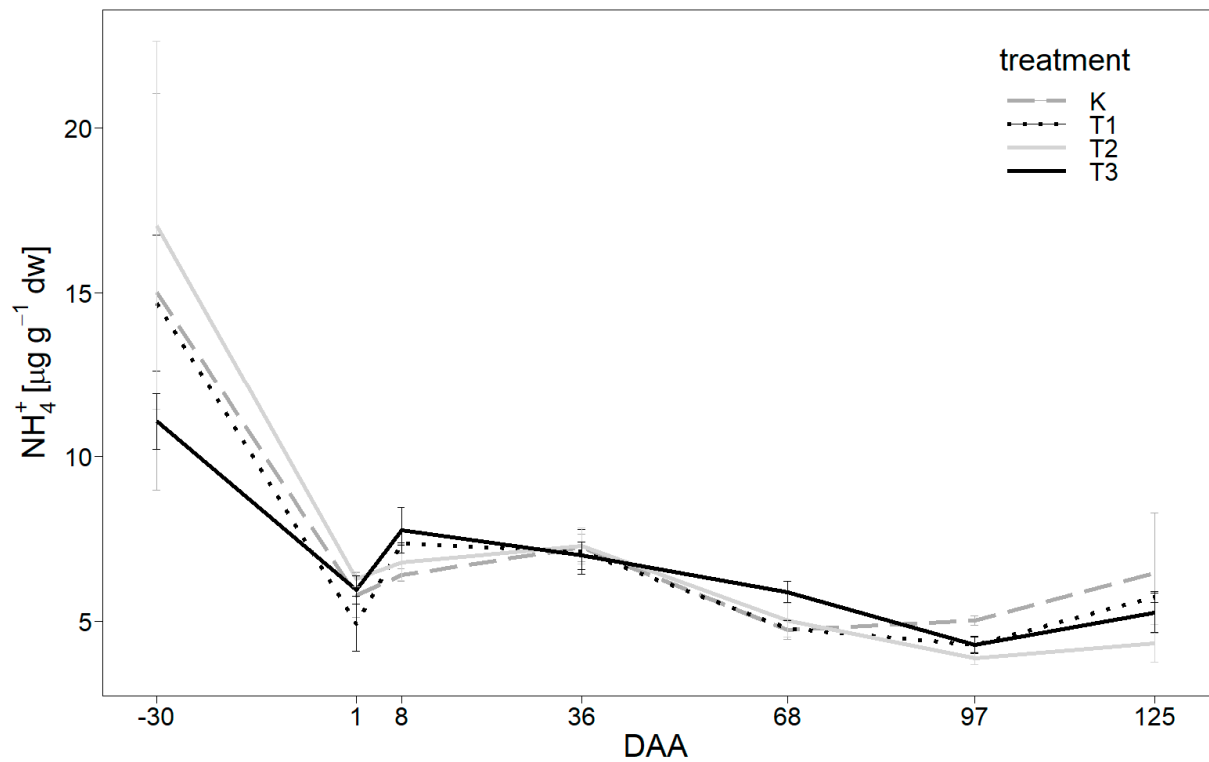

**Figure S3:** Mean ammonium ( $\text{NH}_4^+$ ) concentrations during the field experiment in 2014. Error bars represent standard error of mean;  $n = 3$ . K – control without BC-compost; T1 – 1 % BC-compost; T2 – 0.5 % BC-compost +  $175 \text{ kg N ha}^{-1}$ ; T3 – no fresh BC-compost during this field trial.

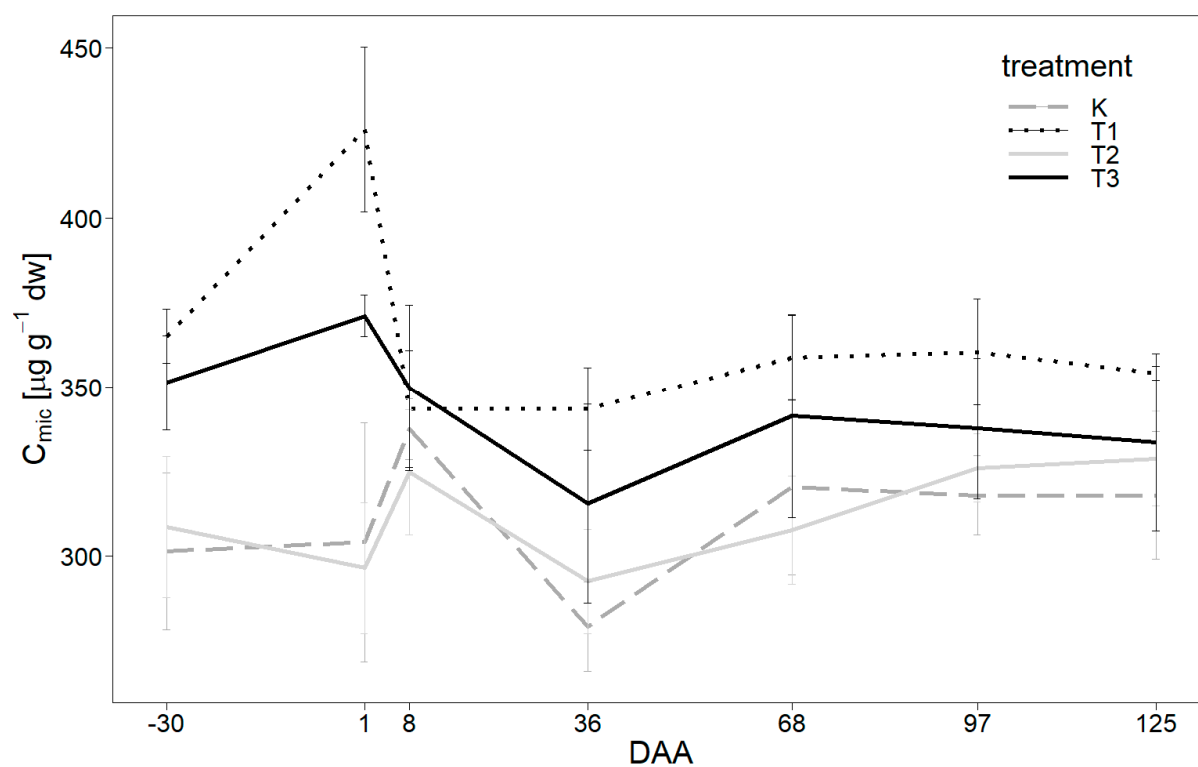

**Figure S4:** Mean C concentrations in the microbial biomass during the field experiment in 2014. Error bars represent standard error of mean;  $n = 3$ . K – control without BC-compost; T1 – 1 % BC-compost; T2 – 0.5 % BC-compost + 175 kg N ha<sup>-1</sup>; T3 – no fresh BC-compost during this field trial.
